# Supplementary material for: Reliability and Concurrent Validity of a Chinese Version of the Alberta Infant Motor Scale Administered to High-Risk Infants in China
Source: Biomed Res Int. 2018 Jun 13;2018:2197163. doi: 10.1155/2018/2197163 (PMC6020663; doi:10.1155/2018/2197163)
Supplement: Supplementary Materials — Column 1: N: case number. Column 2: gender (F: female, M: male). Column 3: age (months). Column 4: birth weight (kg). Column 5: gestational age (weeks). Column 6: A prone: the AIMS prone subsection score recorded independently by rater A. Column 7: A supine: the AIMS supine subsection score recorded independently by rater A. Column 8: A sitting: the AIMS sitting subsection score recorded independently by rater A. Column 9: A standing: the AIMS standing subsection score recorded independently by rater A. Column 10: A total score: the AIMS total score recorded independently by rater A. Column 11: A percentile: the percentile of the AIMS total score recorded independently by rater A. Column 12: B1 prone: the AIMS prone subsection score recorded independently by rater B first scoring. Column 13: B1 supine: the AIMS supine subsection score recorded independently by rater B first scoring. Column 14: B1 sitting: the AIMS sitting subsection score recorded independently by rater B first scoring. Column 15: B1 standing: the AIMS standing subsection score recorded independently by rater B first scoring. Column 16: B1 total score: the AIMS total score recorded independently by rater B first scoring. Column 17: B1 percentile: the percentile of the AIMS total score recorded independently by rater B first scoring. Column 18: C1 prone: the AIMS prone subsection score recorded independently by rater C first scoring. Column 19: C1 supine: the AIMS supine subsection score recorded independently by rater C first scoring. Column 20: C1 sitting: the AIMS sitting subsection score recorded independently by rater C first scoring. Column 21: C1 standing: the AIMS standing subsection score recorded independently by rater C first scoring. Column 22: C1 total score: the AIMS total score recorded independently by rater C first scoring. Column 23: C1 percentile: the percentile of the AIMS total score recorded independently by rater C first scoring. Column 24: ST: PDMS-2 ST subscale score. Column [file 2197163.f1.xlsx]

## Sheet: Sheet1
N	gender	Age	birth weight	gestational age	A prone	A supine	A sitting	A standing	A Total score	A percentile	B1 prone	B1 supine	B1 sitting	B1 standing	B1 Total score	B1 percentile	C1 prone	C1 supine	C1 sitting	C1 standing	C1 Total score	C1 percentile	ST	LO	RE	GR	VI	P-GMQ	P-FMQ	P-TMQ	B2 prone	B2 supine	B2 sitting	B2 standing	B2 Total score	B2 percentile	C2 prone	C2 supine	C2 sitting	C2 standing	C2 Total score	C2 percentile
1	F	7.4	2.75	35	11	9	5	1	26	10-25	9	9	7	1	26	10-25	9	9	5	1	24	10-25	27	33	9	23	32	96	94	94	9	9	7	2	27	10-25	9	9	7	2	27	10-25
2	F	7.4	2.75	35	9	9	8	1	27	10-25	9	9	6	1	25	10-25	9	7	6	0	22	5-10	27	33	8	19	34	96	91	93	9	8	7	2	26	10-25	8	8	7	2	25	10-25
3	F	0.17	1.8	31	2	0	0	0	2	10-25	2	0	0	0	2	10-25	2	0	0	1	3	25-50									2	0	0	0	2	10-25	2	0	0	1	3	25-50
4	F	3	3	38	4	3	2	1	10	25-50	4	3	2	1	10	25-50	4	3	2	1	10	25-50	16	8	3	8	14	98	94	96	4	3	2	1	10	25-50	4	3	2	1	10	25-50
5	M	2.5	2.3	34	3	3	1	1	8	10-25	3	3	1	1	8	25-50	3	3	1	1	8	10-25	11	5	1	7	5	91	94	92	3	3	1	1	8	10-25	3	3	1	2	9	25-50
6	M	2.5	2.4	34	4	3	2	1	10	50	3	3	1	1	8	10-25	4	3	1	1	9	25-50	12	7	2	7	4	96	91	93	4	4	1	1	10	50	4	4	1	2	11	50-75
7	M	2.67	3.8	35	3	3	2	1	9	25-50	3	3	2	1	9	25-50	4	3	2	1	10	25-50	16	9	2	9	7	102	97	100	3	3	2	1	9	25-50	3	3	2	1	9	25-50
8	F	2	2.8	37	3	2	1	1	7	10	3	2	1	1	7	10	3	2	1	1	7	10	11	10	2	8	6	98	94	96	3	2	1	1	7	10	3	2	1	1	7	10
9	F	2	3	39	1	2	1	1	5	5	1	2	0	1	4	＜5	0	2	0	1	3	＜5	11	5	0	5	0	90	76	82	1	3	0	1	5	5	1	2	0	1	4	＜5
10	M	2.23	3.75	40	3	3	0	1	7	10-25	3	3	0	1	7	10-25	3	3	1	1	8	25-50	9	7	1	5	7	91	91	90	2	3	0	2	7	10-25	3	3	0	1	7	10-25
11	M	2.37	1.19	28	1	3	0	1	5	＜5	1	3	0	1	5	＜5	2	3	1	1	7	5-10	1	3	2	5	10	83	94	86	1	3	0	1	5	＜5	1	2	0	1	4	＜5
12	F	2.87	3.45	40	1	3	0	1	5	＜5	1	2	0	1	4	＜5	1	3	0	1	5	＜5	0	5	2	2	6	83	85	82	1	2	0	1	4	＜5	1	2	0	1	4	＜5
13	M	5.5	3.8	39	7	6	3	1	17	10	7	6	3	1	17	10	8	6	3	1	18	10-25	17	16	2	20	23	87	103	93	7	7	4	2	20	25	7	6	4	2	19	10-25
14	F	3.5	2.58	37	3	3	2	1	9	10-25	3	3	2	1	9	10-25	3	3	2	1	9	10-25	18	4	3	10	16	87	91	88	4	2	2	2	10	10-25	4	2	2	2	10	10-25
15	F	1.5	2.4	35	3	2	0	1	6	25-50	3	3	1	1	8	50-75	3	2	0	1	6	25-50	9	5	1	4	6	96	97	96	3	2	1	2	8	50-75	3	2	1	2	8	50-75
16	F	2.07	2.8	40	1	2	0	1	4	＜5	1	2	0	1	4	＜5	1	2	0	1	4	＜5	3	5	2	5	6	87	91	88	1	2	0	1	4	＜5	1	2	0	1	4	＜5
17	F	1.5	2.6	35	1	3	1	0	5	＜5	1	3	0	0	4	＜5	1	3	0	0	4	＜5	5	5	3	3	5	85	82	82	1	3	0	0	4	5	1	3	0	0	4	5
18	M	5.5	1.45	29	7	7	6	2	22	25-50	8	6	6	2	22	25-50	8	6	6	2	22	25-50	21	20	7	20	23	98	103	100	8	7	4	2	21	25-50	8	7	4	2	21	25-50
19	M	4.37	3	38	3	4	1	1	9	＜5	3	3	0	1	7	＜5	3	4	1	1	9	＜5	12	9	4	8	15	90	88	89	4	4	2	2	12	5-10	4	4	1	2	11	5-10
20	M	5.2	3.1	37	4	4	2	1	11	＜5	4	4	2	1	11	＜5	3	4	2	1	10	＜5	13	9	4	11	16	85	85	83	5	3	2	2	12	＜5	4	4	2	2	12	＜5
21	M	3.5	3.95	39	2	3	1	1	7	5	3	3	1	1	8	5-10	2	3	1	1	7	5	7	6	2	5	9	89	88	88	3	3	2	1	9	10-25	3	3	1	1	8	5-10
22	M	6.63	3.85	40	4	5	2	1	12	＜5	4	5	2	1	12	＜5	4	5	2	1	12	＜5	18	13	4	20	21	83	94	86	5	4	2	2	13	＜5	5	4	2	2	13	＜5
23	F	6	2.9	38	8	6	9	3	26	50	8	6	9	3	26	50	8	6	9	3	26	50	30	23	13	26	37	106	106	107	7	5	8	3	23	25-50	7	6	8	3	24	25-50
24	F	0.33	1.8	34	1	1	0	1	3	10-25	1	1	0	1	3	10-25	1	1	0	1	3	10-25									1	1	0	1	3	10-25	1	1	0	1	3	10-25
25	M	1.57	3.8	39	1	2	1	0	4	＜5	1	2	1	0	4	＜5	1	2	1	0	4	＜5	5	5	0	4	4	91	94	92	2	2	0	1	5	10	2	2	0	0	4	＜5
26	F	2.6	3.4	38	2	2	0	0	4	＜5	2	2	0	0	4	＜5	1	0	0	0	1	＜5	3	4	2	5	4	87	88	86	1	3	0	1	5	＜5	2	2	0	1	5	＜5
27	M	3.6	3.5	40	4	4	1	1	10	10-25	4	4	1	1	10	10-25	4	4	1	2	11	25	18	10	2	7	13	98	94	96	4	3	1	2	10	10-25	4	3	1	2	10	10-25
28	M	3.8	3.25	39	1	2	0	1	4	＜5	1	2	0	1	4	＜5	1	2	0	1	4	＜5	6	4	2	6	6	85	88	85	1	2	0	0	3	＜5	1	2	0	1	4	＜5
29	M	0.87	2.35	35	2	2	0	1	5	25-50	2	2	0	1	5	25-50	2	2	0	1	5	25-50									2	2	0	1	5	25-50	2	2	0	1	5	25-50
30	M	4.7	1.7	33	6	5	2	2	15	10-25	7	5	2	2	16	10-25	6	5	2	1	14	10	18	12	6	13	22	96	100	97	5	5	2	2	14	10	6	5	2	2	15	10-25
31	M	3.57	1.55	30	4	4	1	1	10	10-25	4	4	1	1	10	10-25	4	4	1	1	10	10-25	13	9	6	10	6	100	91	96	5	4	2	1	12	25-50	5	4	1	1	11	25-50
32	M	4.93	3.79	39	5	5	3	1	14	5-10	5	5	3	1	14	5-10	5	5	3	1	14	5-10	17	10	3	13	19	85	91	86	5	5	3	1	14	5-10	5	5	3	1	14	5-10
33	M	5.57	3.45	39	3	4	1	1	9	＜5	3	4	1	1	9	＜5	3	4	1	1	9	＜5	18	9	6	14	20	90	94	90	3	4	1	2	10	＜5	3	4	1	2	10	＜5
34	F	6.4	2.75	39	9	8	8	3	28	50	9	8	8	3	28	50	8	8	8	3	27	25-50	28	34	9	25	31	104	103	104	9	8	8	3	28	50	9	8	8	3	28	50
35	M	9.27	3.6	39	17	9	12	6	44	25-50	17	9	12	6	44	25-50	15	9	11	3	38	10-25	34	40	14	30	58	100	97	98	17	9	11	5	42	25-50	16	9	12	5	42	25-50
36	F	5.33	1.6	30	7	7	4	2	20	25-50	7	7	4	2	20	25-50	7	7	4	2	20	25-50	17	26	7	22	25	98	103	100	7	7	4	2	20	25-50	7	7	4	2	20	25-50
37	F	5.53	2.2	33	10	8	8	2	28	50	10	8	8	2	28	50	9	8	8	2	27	25-50	28	29	9	27	29	102	103	103	9	8	8	3	28	50	9	8	8	3	28	50
38	M	5.4	2.3	33	5	4	3	2	14	＜5	5	4	3	2	14	＜5	5	4	3	2	14	＜5	18	17	2	13	22	90	94	90	4	4	3	2	13	＜5	4	4	3	2	13	＜5
39	M	5.4	2.2	33	7	8	4	3	22	25-50	7	8	4	3	22	25-50	7	8	4	3	22	25-50	21	21	7	17	27	98	100	98	6	8	4	3	21	25-50	6	8	4	3	21	25-50
40	M	5.33	1.3	31	7	5	2	2	16	5-10	6	5	2	2	15	5-10	6	5	2	2	15	5-10	18	18	3	12	23	90	97	92	6	5	2	2	15	5-10	6	5	2	2	15	5-10
41	M	4.7	3.05	38	5	4	1	2	12	5	5	4	1	2	12	5	5	4	1	1	11	＜5	18	13	2	12	22	87	94	89	4	4	2	2	12	5	4	4	2	1	11	＜5
42	M	7.5	4.15	39	11	7	10	3	31	25-50	11	7	10	3	31	25-50	11	7	10	3	31	25-50	32	32	11	29	30	102	100	101	11	7	10	3	31	25-50	11	7	10	3	31	25-50
43	F	4.83	4	40	5	4	4	2	15	10-25	5	4	5	2	16	10-25	5	4	1	5	15	10-25	21	14	4	12	22	98	100	98	5	4	4	2	15	10-25	5	4	4	2	15	10-25
44	M	4.07	2.7	38	2	4	0	0	6	＜5	3	3	0	0	6	＜5	3	3	0	0	6	＜5	3	4	1	4	19	74	88	78	2	4	0	0	6	＜5	3	3	0	0	6	＜5
45	M	6.07	1.75	32	6	6	2	2	16	＜5	6	6	2	2	16	＜5	7	6	2	2	17	＜5	19	19	7	20	21	79	82	78	6	6	3	2	17	＜5	6	6	3	2	17	＜5
46	F	4.43	2.55	33	4	5	1	2	12	5-10	4	5	1	2	12	5-10	4	4	1	2	11	5-10	16	13	6	11	16	96	91	92	5	4	2	2	13	10-25	5	4	1	2	12	5-10
47	M	3.27	1.19	28	3	3	0	1	7	5-10	4	3	0	1	8	5-10	3	3	0	1	7	5-10	7	3	3	7	7	85	88	85	3	3	0	1	7	5-10	4	3	0	1	8	5-10
48	M	4.3	2.85	36	5	4	3	2	14	25-50	5	4	3	2	14	25-50	5	4	3	2	14	25-50	18	14	4	14	21	96	100	97	5	4	4	2	15	25-50	5	4	4	2	15	25-50
49	F	4.3	2.3	36	5	4	3	1	13	10-25	5	4	3	1	13	10-25	5	4	3	1	13	10-25	17	13	3	13	21	96	100	97	5	4	3	2	14	25-50	6	4	3	2	15	25-50
50	F	7	1.45	32	10	8	7	3	28	25-50	10	8	7	3	28	25-50	10	8	7	3	28	25-50	26	35	11	30	34	98	100	98	9	8	7	3	27	25-50	9	8	7	3	27	25-50
